# Supplementary material for: A tyrannosauroid metatarsus from the Merchantville Formation of Delaware increases the diversity of non-tyrannosaurid tyrannosauroids on Appalachia
Source: PubMed Central journal article supplement (PMC5712462; doi:10.7717/peerj.4123), 2017-11-30
Supplement: peerj-05-4123-s001.pdf [file peerj-05-4123-s001.pdf]

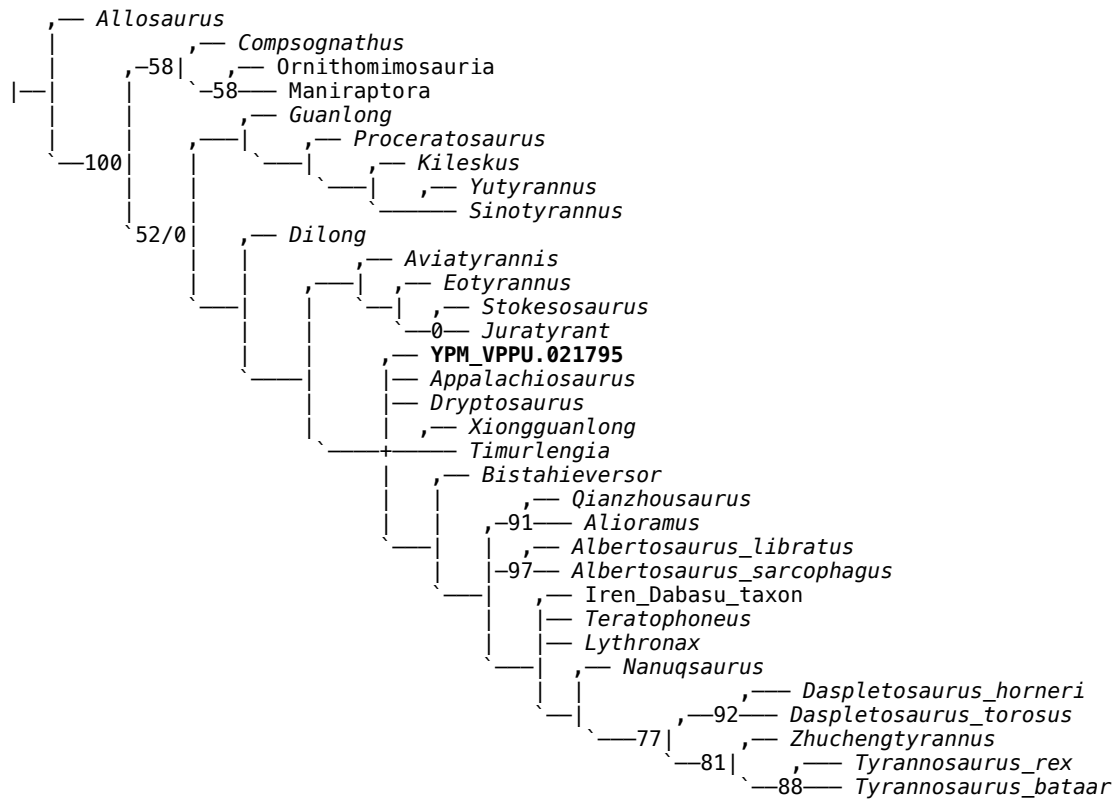

Supplementary Figure 1. Strict consensus tree from 32 MPTs for the analysis of YPM VPPU. 021795 in the matrix of Carr et al. (2017). Numbers greater than 3 are bootstrap values (100 replicates in TNT, Goloboff & Catalano, 2016).

Analysis within Coelurosauria (TWiG matrix after Brusatte et al., 2014).

YPM\_VPPU.021795

????????????????????????????????????????????????????????????????????????????????????????????  
????????????????????  
????????????????????????????????????????????????????????????????????????????????????????????  
????????????????????  
????????????????????????????????????????????????????????????????????????????????????????????  
????????????????????  
????????????????????????????????????????????????????????????????????????????????????????????  
????????????????????  
??1?????0??  
0????????????????????????????????????????????????????????????????????????????????????????  
?????  
????????????????????????????????????????????????????????????????????????????????????????  
????????????????????  
????????????????????????????????????????????????????????????????????????????????????????  
?????????10?1??????  
????????????????????????????????????????????????????????????????????????????????????  
0?0????????????????  
??????????????

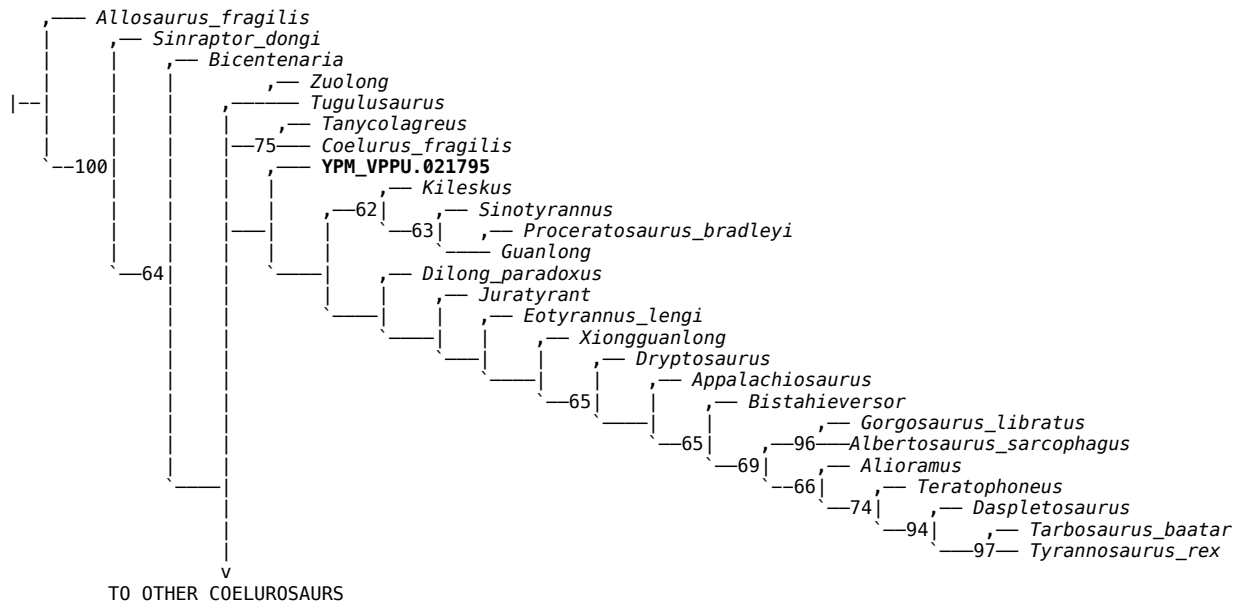

Supplementary Figure 2. Strict consensus tree from 81 MPTs for the analysis of YPM VPPU. 021795 in the matrix of Brusatte et al. (2014). Numbers greater than 3 are bootstrap values (100 replicates in TNT, Goloboff & Catalano, 2016).
