# Supplementary material for: A tyrannosauroid metatarsus from the Merchantville formation of Delaware increases the diversity of non-tyrannosaurid tyrannosauroids on Appalachia
Source: PeerJ journal article supplement (doi:10.7717/peerj.4123), 2017-11-30
Supplement: Supplementary_dataset_for_analysis_in_Tyrannosauroid_in_TNT_(matrix_after_Carr_et_al.,_2017).tnt [file Supplementary_dataset_for_analysis_in_Tyrannosauroid_in_TNT_%28matrix_after_Carr_et_al.%2C_2017%29.tnt]

????????????????????????????000?????0

Sinotyrannus

0???12?????10?1?1?1110??0?0??00?????0??1?0?0?????????

1????????????????????????????????????????????????????????????????????????????????????

????????????????????????????????????????????????????????????????????????????????????

?????1????????????????????????????????0?

01????????????????????????????????????????????????????????????????00?100?0?1?

010001000????????????????????????????????????????????????????????????

Yutyranus

10101221?101101111?11002?0?000000100??1?1?0?000010????110??000?011111000??0000??

0210??0?1000??0?011121?01?12100002?0000??1????00?20?00?0?0??????1??????11?

2???10?101?????????0010000????????????????????????????????????????01010?0?11?1?

01020200100??0?0?11?00000?000?00??01?0100??00100?1????100000000000?0011?000?

00000010??10100110000000?011?0?101001001?01??1???0[01]01010?00?00?0?00

Guanlong

000012?00000101112001000?0?00100?100?00?1000000?10?0?010000000?0012?1?

00110000??010??00?100011000001010000?10??010?1100000?0000001000000000?0?00??

0000000011?0000100000?0?00000?????????????02001?0?010?0000100000?000??0????

0000????10?1?0000000010?????0??101010?010?????????00000001000001010000?0?

0000001000000100000000000010000010010000000001010000000000001?

011000000001010000000?00?00





1????????????????????????????????????????????????????????????2?2?01?0?0??

00001001000110000010????????????????????????????????????????110?101????001111?  
0????????????????????01110012?0??1????????????????

Dryptosaurus

1????????????????????????????????????????????????????????

00????????????????????????????????????????????????????????????????????????????????

????????????????????????????????????????????????????????????????????????????????

????????????????????0?0??1212?1?1?????????????????1?

00????????????????????????????????????????????????????????10100?????1?????11????????????????????

1???????12?????????1012??1?0011111?????1???

Appalachiosaurus

1??1?0????????????????000001001??000100?01?01001111???1200101?1?1?001101?002?

01010???1?0?

0????????????????????????????????????????????????????????????????????????????????

000000010100010?00????????????????????????????????????????11?110?01?1?????????0??1?????

2?2?0?0????????????????????????????????????????0????????????????????????????????????

1???????12111?111110?????11?111111110110?0

Bistahieversor

1?0?0011010111200110000010?101000210101?0100111102??

200101011010011001102000010?02110??1000000?00?0001210001021100010001000001??10?

31111110??1??1021101002100122111110101??00000?010001110??????1???11?

111111[01]101?1110110011?1?1111100?011001212101100112?1?0?2?2?0100?????









????????????????????????????????????

Zhuchengtyrannus

1?????????????????1010??0?????1??00??110?111?1?

0211????????????????????????????????????????????????????????????????????????????????????

????????????????????????????????????????????????????????????????????????????????????

?????1111?01101????????????????????

11010????????????????????????????????????????????????????????????????????????????????????

????????????????????????????????????

Tyrannosaurus\_bataar

111100211111222001110112001110111211301102111111021121010211012010??1?

1020100211122111110110111012110121101002110002100111112111013212111101?

111101101100312122201111111111?

11111011011111111111211110111110[01]201111111011111?111111201101122212?

10111211111212111020111111?111111?102111111??1??1?1111110212111011111?

11111210111101101110100001121111112111112122111211110111111111112111

Tyrannosaurus\_rex

1111002111112220011101121011101112[01]0[13]0110211111021121010211112010??1?

102010021102211111011[01]1110121101211011021100021001111112111013[12]12111111111

1011110031212220111111110111110110111111111121111011111002011111110111111

1111120110112221211011121111121211102011111111111111021111012111111111110212

1110111111111112101111011011101000011211111112111112122111211110111111111112111

YPM\_VPPU.021795

????????????????????????????????????????????????????????????????????????????????????????

????????????????????????????????????????????????????????????????????????????????????????

??????????????????????????????????????????????????????????????????????????????????????

????????????????????????????????????????????????????????????????????????????????????????

????????????????????????????????????????1??10?10??
